1 **Understanding the diversity of DNA methylation in Mycobacterium**  
2 **tuberculosis**

3

4 **Authors:**

5 Victor Ndhlovu<sup>1,2,9, ¶</sup>, Anmol Kiran<sup>3,7, ¶</sup>, Derek Sloan<sup>6</sup>, Wilson Mandala<sup>3,4</sup>, Marriot  
6 Nliwasa<sup>2,9</sup>, Dean B Everett<sup>7</sup>, Mphatso Mwapasa<sup>9</sup>, Konstantina Kontogianni<sup>5</sup>, Mercy  
7 Kamdolozi<sup>2</sup>, Elizabeth L Corbett<sup>3,9,10</sup>, Maxine Caws<sup>5,8</sup>, Gerry Davies<sup>1,3</sup>

8 **Affiliations**

- 9 1. University of Liverpool, Liverpool, UK  
10 2. University of Malawi, College of Medicine, Biomedical Sciences Department,  
11 Blantyre, Malawi  
12 3. Malawi-Liverpool Wellcome Trust, Blantyre, Malawi  
13 4. Academy of Medical Sciences, Malawi University of Science and Technology  
14 (MUST), Thyolo, Malawi  
15 5. Liverpool School of Tropical Medicine, Liverpool, UK  
16 6. University of Saint Andrews, UK  
17 7. Edinburgh University, Edinburgh, UK  
18 8. Birat Nepal Medical Trust, Lazimpat, Kathmandu.  
19 9. Helse Nord Tuberculosis Initiative Project, University of Malawi, College of  
20 Medicine, Blantyre, Malawi.  
21 10. London School of Hygiene & Tropical Medicine (LSHTM), London, United  
22 Kingdom.

23 ¶These authors contributed equally as first authors.

24

25 **Corresponding Author:**

26 Email: [vndhlovu@medcol.mw](mailto:vndhlovu@medcol.mw) (VN)

## 27 **Abstract**

28

29 Although *Mycobacterium tuberculosis* (*Mtb*) strains exhibit genomic homology of >99%,  
30 there is considerable variation in the phenotype. The underlying mechanisms of  
31 phenotypic heterogeneity in *Mtb* are not well understood but epigenetic variation is  
32 thought to contribute. At present the methylome of *Mtb* has not been completely  
33 characterized. We completed methylomes of 18 *Mycobacterium tuberculosis* (*Mtb*)  
34 clinical isolates from Malawi representing the largest number of *Mtb* genomes to be  
35 completed in a single study using Single Molecule Real Time (SMRT) sequencing to date.  
36 We replicate and confirm four methylation disrupting mutations in lineages of *Mtb*. For the  
37 first time we report complete loss of methylation courtesy of C758T (S253L) mutation in  
38 the *MamB* gene of Indo-oceanic lineage of *Mtb*. We also conducted a genomic and  
39 methylome comparison of the Malawian samples against a global sample. We confirm  
40 that methylation in *Mtb* is lineage specific although some unresolved issues still remain.

41

## 42 **Introduction**

43 Tuberculosis (TB) is a disease that remains a global health crisis with an estimated 1.7  
44 billion people infected of which 5-10% will develop the disease in their lifetime (WHO,  
45 2020). The major barriers to disease elimination have been lack of an effective vaccine  
46 or fast and effective diagnostic tools, increasing drug resistance and co-infection with HIV  
47 (Davies et al., 2014; De Schacht et al., 2019). *Mycobacterium tuberculosis* (*Mtb*), the  
48 causative agent of TB, has a genome with a uniformly high guanine + cytosine (65.6%)  
49 owing to minimal incorporation of foreign DNA during its evolution (Cole, 1999). One

50 unique feature of the *Mtb* genome is the large number of genes it contains. Up to 10% of  
51 the total coding potential contains polymorphic guanine-cytosine repetitive sequences  
52 (PGRS) (Cole, 2002; Grover et al., 2018) which encode two unrelated families of acidic  
53 glycine-rich proteins- proline-glutamic acid (PE) and proline-proline glutamic acid (PPE).  
54 Specific functions of these genes and their proteins remain unclear (Cole, 2002; Fishbein  
55 et al., 2015; J E Phelan et al., 2016) although they have been implicated in immune  
56 evasion and virulence (Fishbein et al., 2015; J E Phelan et al., 2016) . Consistently,  
57 evidence has suggested that proteins located in the cell wall and cell membranes are  
58 responsible for diversity in antigenic structure and virulence. This greatly contributes to  
59 *Mtb* evolution and adaptation to different hosts (Brennan & Delogu, 2002; Filliol et al.,  
60 2006). Although *Mtb* strains have been shown to exhibit genomic homology of >99%  
61 (Hershberg et al., 2008) such similarity is rarely replicated in the phenotype. This  
62 phenotypic heterogeneity has been seen in the virulence of the *Beijing* strain which has  
63 been associated with increasing multidrug resistant TB (MDR-TB) (Cowley et al., 2008;  
64 van der Spuy et al., 2009) whereas the East African Indian (EAI) lineage has been  
65 associated with lower rates of transmission compared to other lineages (Albanna et al.,  
66 2011). Similarly, the Euro-American lineage is the most geographically successful strain  
67 (Gagneux & Small, 2007) but specific mechanisms supporting this successful  
68 dissemination remain unknown. Phenotypic heterogeneity in *Mtb* has been associated  
69 with epigenetic inheritance (Balaban et al., 2004) and the most common epigenetic  
70 mechanism in  
71 *Mtb* is DNA methylation (Casadesus & Low, 2006; Shell et al., 2013). A few studies have  
72 characterized the *Mtb* methylome and revealed three 6-methyladenine (m6A) motifs and

73 their cognate methyltransferases (*Mtases*), *MamA*, *MamB* and *HsdM* respectively (Shell  
74 et al., 2013; Zhu et al., 2015). Using Pacific Biosciences Single Molecule Real Time  
75 (SMRT) sequencing, two studies have recently shown that specific mutations in the  
76 *Mtases* lead to loss of *Mtase* activity and may play a role in evolution of *Mtb* (J. Phelan et  
77 al., 2018; Zhu et al., 2015). At present the methylome of *Mtb* has not been completely  
78 characterized, neither has any resulting information been correlated with phenotypic  
79 heterogeneity observed in TB patients. Understanding the complete biology of *Mtb* will  
80 aid in developing strategies for reducing the *Mtb* treatment duration from the standard 6  
81 months.

82 We present characterization of methylomes of 18 *Mycobacterium tuberculosis* (*Mtb*)  
83 isolates from patients in Blantyre, Malawi including 12 Euro-American lineage (L4) strains,  
84 the most prevalent phylogenetic lineage in Malawi, 3 Beijing lineage strains (L2) and 3  
85 Indo-oceanic lineage (L1) strains. This work presents the largest number of *Mtb* genomes  
86 of a single lineage to be completed in a single study using Single Molecule Real Time  
87 (SMRT) sequencing to date. Additionally, we confirm three confident sequence motifs in  
88 *Mtb* and confirm the strain specific mutations responsible for loss of methyltransferase  
89 activity in *Mtb*. Additionally, for the first time we report the complete loss of methylation  
90 courtesy of a novel mutation C758T (S253L) in Indo-oceanic lineage (L1). Through a  
91 genomic and methylome comparative analysis with a global sample of 16 samples we  
92 report previously unreported mutation affecting the *pks15/1* locus in L6 and L6 isolates.

93

94

## 95 **Results**

### 96 **Lineage Analysis of *Mycobacterium tuberculosis***

97 Experimental (RD-PCR) and computational (TB-Profiler) outcomes on Malawian strains  
98 lineage identification were consistent as: 3/18 (17%) were L1 (Indo-Oceanic), 3/18 (17%)  
99 were L2 (East-Asian) and 12/18 (66%) were L4 (Euro-American). *De novo* reporting of  
100 global sample lineages (J. Phelan et al., 2018) (16 samples) using TB-Profiler was as  
101 follows : 3/16 L1(Indo-oceanic), 2/16 L2 (East-Asian), 3/16 L4 (Euro-American), 2/16 L5  
102 (West African 1 and 6/16 L6 (West African 2) (Table 1). Using a reference with an intact  
103 *pks15 (Rv2947c)* gene, it was possible to identify the 15/34 strains belonging to L4 in the  
104 combined dataset. These possessed a 7 bp deletion (GGGCCGC) in the *pks15/1* gene  
105 as previously documented (Constant et al., 2002; Gagneux & Small, 2007). Additionally,  
106 *pks15 (Rv2947c)* could be used to assign lineages to the rest of the samples. All L1 (6/34  
107 strains) had a G1318C substitution and GGGCCGC insertion while L2 (5/34) strains had  
108 a GGGCCGC insertion only. All L5 samples had a 9bp deletion (CGGTGCTGG,1097-  
109 1105), a distinct substitution A50G and an insertion GGGCCGC. A L1, L5, L6 (1318 G>C  
110 substitution) and a L6 (1658 1bp insertion of G), L1, L2, L5 (1658 7bp insertion) (Fig 1)

111

112

113

114

115

116 **Table 1:** Lineages and sub-lineages of the samples reported by TB-Profiler using  
 117 assembled genomic sequences (ERS-Malawian and SAMEA-global samples).

| <u>Sample ID</u> | <u>Lineage</u> | <u>Sub-lineage</u> | <u>Sub-sub-lineage</u> |
|------------------|----------------|--------------------|------------------------|
| ERS2711939       | Lineage4       | Lineage4.3         | Lineage4.3.4           |
| ERS2711940       | Lineage4       | Lineage4.3         | Lineage4.3.4           |
| ERS2711941       | Lineage4       | Lineage4.3         |                        |
| ERS2711942       | Lineage4       | Lineage4.3         | Lineage4.3.4           |
| ERS2711943       | Lineage1       | Lineage1.1         | Lineage1.1.3           |
| ERS2711944       | Lineage4       | Lineage4.3         | Lineage4.3.4           |
| ERS2711945       | Lineage4       | Lineage4.3         | Lineage4.3.4           |
| ERS2711946       | Lineage4       | Lineage4.3         | Lineage4.3.4           |
| ERS2711947       | Lineage4       | Lineage4.3         | Lineage4.3.4           |
| ERS2711948       | Lineage1       | Lineage1.1         | Lineage1.1.3           |
| ERS2711949       | Lineage4       | Lineage4.3         | Lineage4.3.4           |
| ERS2711950       | Lineage4       | Lineage4.5         |                        |
| ERS2711951       | Lineage4       |                    | Lineage4.1.2           |
| ERS2711952       | Lineage4       | Lineage4.3         | Lineage4.3.4           |
| ERS2711953       | Lineage2       | Lineage2.2         |                        |
| ERS2711954       | Lineage2       | Lineage2.2         |                        |
| ERS2711955       | Lineage2       | Lineage2.2         |                        |
| ERS2711956       | Lineage1       | Lineage1.1         | Lineage1.1.3           |
| SAMEA104606019   | Lineage1       | Lineage1.1         | Lineage1.1.3           |
| SAMEA104606020   | Lineage1       | Lineage1.1         | Lineage1.1.3           |
| SAMEA104606021   | Lineage1       | Lineage1.1         | Lineage1.1.3           |
| SAMEA104606022   | Lineage5       |                    |                        |
| SAMEA104606023   | Lineage2       | Lineage2.2         | Lineage2.2.1           |
| SAMEA104606024   | Lineage4       | Lineage4.3         | Lineage4.3.4           |
| SAMEA104606025   | Lineage4       | Lineage4.1         | Lineage4.1.2           |
| SAMEA104606026   | Lineage6       |                    |                        |
| SAMEA104606027   | Lineage6       |                    |                        |
| SAMEA104606028   | Lineage2       | Lineage2.2         | Lineage2.2.1           |
| SAMEA104606029   | Lineage4       | Lineage4.3         | Lineage4.3.4           |
| SAMEA104606030   | Lineage5       |                    |                        |
| SAMEA104606031   | Lineage6       |                    |                        |
| SAMEA104606032   | Lineage6       |                    |                        |
| SAMEA104606033   | Lineage6       |                    |                        |
| SAMEA104606034   | Lineage6       |                    |                        |

118

119

120

121

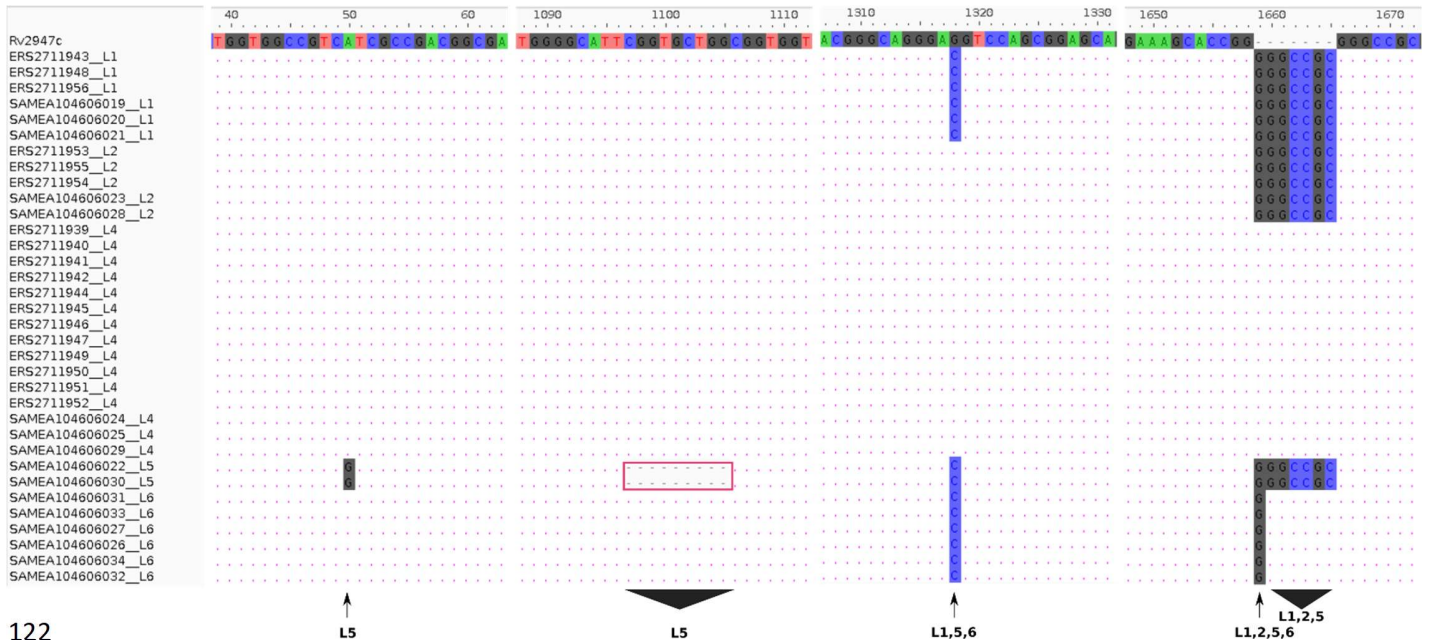

122  
123 **Figure 1: Lineage specific sequence differences relative to the reference gene**  
124 **pks15 (Rv2947c)**

125 The pks15 gene from 34 samples was aligned against the reference to display lineage  
126 specific variations. Variants were observed in four different locations/ranges within the  
127 gene discriminating four lineages L5 (50, A>G substitution), L 5 (1097-1105  
128 CCGTGCTGG deletion), L1, L5, L6 (1318 G>C substitution) and L6 (1658 1 bp insertion  
129 of G), L1, L2, L5 (1658 7bp insertion)

130

### 131 DNA Methylation Patterns

132 The m6A methylation motifs present in more than 10 isolates were CACGCAG (820  
133 sites), CTCCAG (1947 sites), CTGGAG (1947 sites), GATN<sub>4</sub>RTAC (363 sites) and  
134 GTAYN<sub>4</sub>ATC (363 sites), Motifs CTCCAG and GATN<sub>4</sub>RTAC are paired with CTGGAG  
135 and GTAYN<sub>4</sub>ATC respectively (S1 Table). No methylation of CTGGAG and CTCCAG  
136 was reported in all L2 samples including one L6 sample (SAMEA104606027). One  
137 sample from L4 (ERS2711941) lacked methylation in CTCCAG motif (Fig 2A). These

138 motifs are methylated by *mamA* *Mtase* (Shell et al., 2013). Multiple sequence comparison  
139 with the reference gene (*Rv3263*) revealed that all L2 samples had a A809C change  
140 resulting in E270A as previously reported (J. Phelan et al., 2018; Shell et al., 2013; Zhu  
141 et al., 2015) (including G1199C, W400S in two samples only). Consequently, non-  
142 methylated L6 samples had an alteration at A1378G resulting in A460T in *Rv3263*. The  
143 L4 sample showing no methylation in motif **CTCC**A**G** had a synonymous substitution at  
144 C216T and a non-synonymous substitution at G454A resulting in G152S amino acid  
145 substitution. To our knowledge, this potentially methylation disrupting mutation has not  
146 been previously reported. The motif **CACGC**A**G** is methylated by the *mamB* *Mtase* (J.  
147 Phelan et al., 2018; Zhu et al., 2015). Two of the six L1 samples (ERS2711948,  
148 ERS2711956) lacked this methylation (Fig 2A). Methylation in the rest of the samples was  
149 however below 80% (range 56% - 79.6%) (Fig 2C). Surprisingly, all L1 samples (6)  
150 possessed a C758T resulting in amino acid change S253L in the *mamB* gene (*Rv2024c*).  
151 This mutation has previously been reported to be responsible for partial loss of  
152 methylation in L1 samples (J. Phelan et al., 2018). This is the first time that mutation  
153 S253L is being associated with complete loss of *MamB* *Mtase*. Lineage 2 sample  
154 (ERS2711953) and L4 sample (ERS2711945) had low methylation in motif **CACGC**A**G**  
155 (65% and 73 %) compared to other samples from the same lineage (100%) but these  
156 samples had no specific mutations in the *mamB* gene. No effect of L6 specific mutation  
157 R289C and L5 specific mutation L452V was observed on the *mamB* methylation in these  
158 lineages (Fig 2C). However, non-lineage specific multiple variation was reported at 3' end.  
159 Motifs **G**A**TN<sub>4</sub>R**T**A**C**** (363 sites) and **G**T**AYN<sub>4</sub>**A**T**C**** (363 sites) are methylated by *hsdM*  
160 (*Rv2756c*) and *hsdS* (*Rv2761c*) genes (J. Phelan et al., 2018; Zhu et al., 2015) . One L1



161 sample (ERS2711956) showed no methylation in either motif however, ERS2711948 was  
 162 methylated at GTAY N<sub>4</sub>ATC only (Fig 2A). The *hsdM* gene sequences were identical for  
 163 all L1 samples and no 5'-upstream alterations (300bp) were reported either. All the L4  
 164 samples lacking GATN<sub>4</sub>RTAC/GTAYN<sub>4</sub>ATC methylation had mutations at T917C  
 165 resulting in L306P in *hsdM* gene and G74T resulting in G25V amino acid change in *hsdS*  
 166 gene. While the T917C (L306P) was previously characterized (J. Phelan et al., 2018;  
 167 Shell et al., 2013; Zhu et al., 2015), the G74T(G25V) mutation in *hsdS* gene has not been  
 168 previously reported. The distribution of lineages specific motif methylation is show in Fig  
 169 2B and Fig 2D.

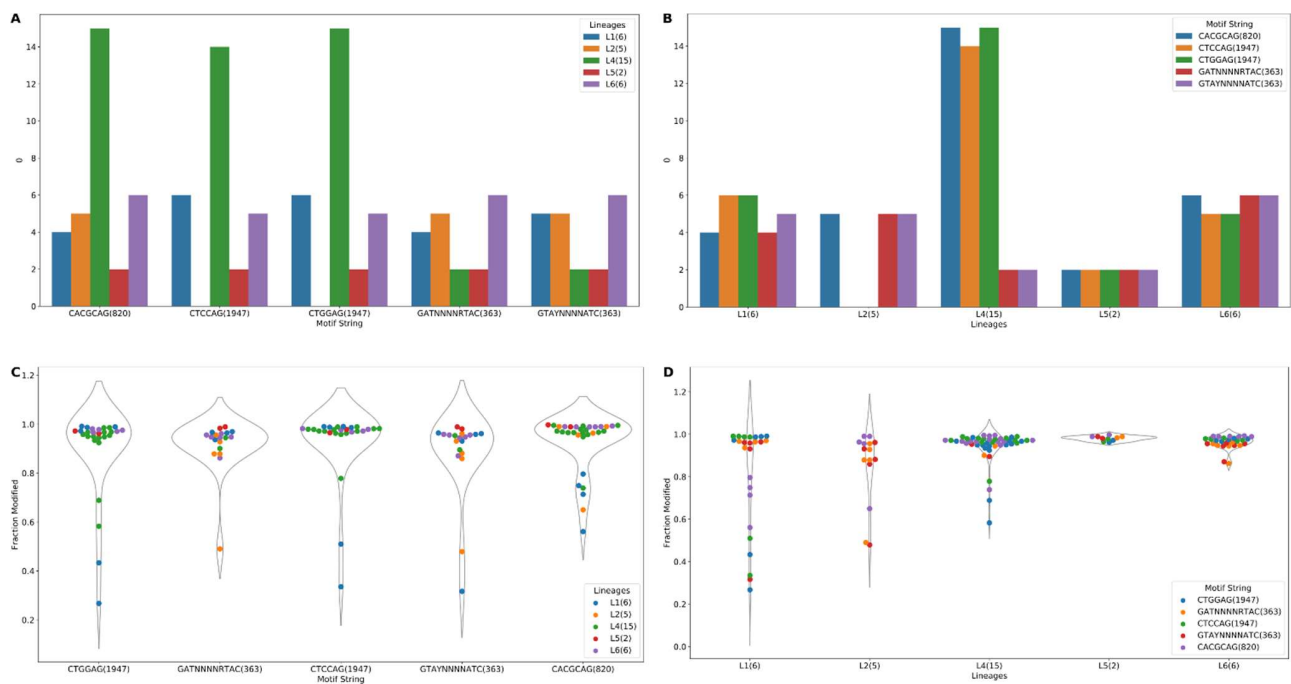

170

## 171 **Figure 2: Methylation summary**

172 (A) Distribution of methylated samples in each Lineage for the motifs. (B) Distribution of  
 173 samples with methylated motifs in each lineage. (C) Methylation efficiency in samples  
 174 for each motif. (D) Methylation efficiency by motif in each lineage.

## 175 **Methylation Efficiency among lineages**

176 Among the samples having methylation in major motifs, most reported methylation  
177 efficiency was higher than 82% (Fig 2C, S1 Table). Lineage 4 sample (ERS2711941) had  
178 58% methylation for **CTCCAG** and it lacked methylation on the **CTGGAG** motif while  
179 another L4 sample (ERS2711945) had 69% and 79% methylation on **CTGGAG** and  
180 **CTCCAG** respectively. Two L1 samples (ERS2711948, ERS2711956) showing  
181 methylation of 27% and 36%, 43% and 51% for **CTGGAG** and **CTCCAG** respectively but  
182 having no specific mutation in methylation conferring genes. Methylation distribution  
183 within motifs for each sample is displayed in Fig 2D. Lineage 1 sample (ERS2711948)  
184 was methylated at 32% on motif **GTAYN<sub>4</sub>ATC**, while L2 sample (ERS2711953) was  
185 methylated at 48% on this motif and 49% on motif **GATN<sub>4</sub>RTAC**. Other samples with low  
186 efficiency were as follows: ERS2711953 from L2 with 65% methylation efficiency and L1  
187 samples SAMEA104606020, SAMEA104606019, SAMEA104606021 and ERS2711943  
188 with 71%, 80%, 75% and 56% respectively on CACGCAG (Fig 2C and Fig 2D).

189

## 190 **Comparison of Methylation within *Mtb* strains**

191 The strain arrangements in the m6A IPD ratio based cladogram clusters and genome  
192 based maximum likelihood (ML) phylogeny were compared (Fig 3). The samples  
193 clustered into four IPD based groups. However, in the ML phylogeny lineages formed  
194 distinct clusters. Lineage 2 samples and one L6 sample (SAMEA104606027) with no  
195 **CTGGAG** and **CTCCAG** methylation clustered together. Two samples belonging to L4  
196 (ERS2711951, SAMEA104606025) having no methylation in **GATN<sub>4</sub>RTAC** and  
197 **GTAYN<sub>4</sub>ATC** motifs clustered with L5 and L6 samples in the IPD ratio cladogram (Fig 3).

198 In the recombination hotspot check, 256 genes were reported to have been affected (Fig  
199 4). Ninety-one well annotated genes were affected due to insertions/deletions (Indels)  
200 varying size from 1 to 36016pb affecting a large number of PPE family (21), PE-PGRS  
201 family (25) and ESAT 6 (6) genes. Lineage specific recombination relative rate to mutation  
202 ratio ( $r/m$ ) reported as L1: 0.968310, L2:1.865780, L4:4.915385, L5:1.001656,  
203 L6:1.066062.

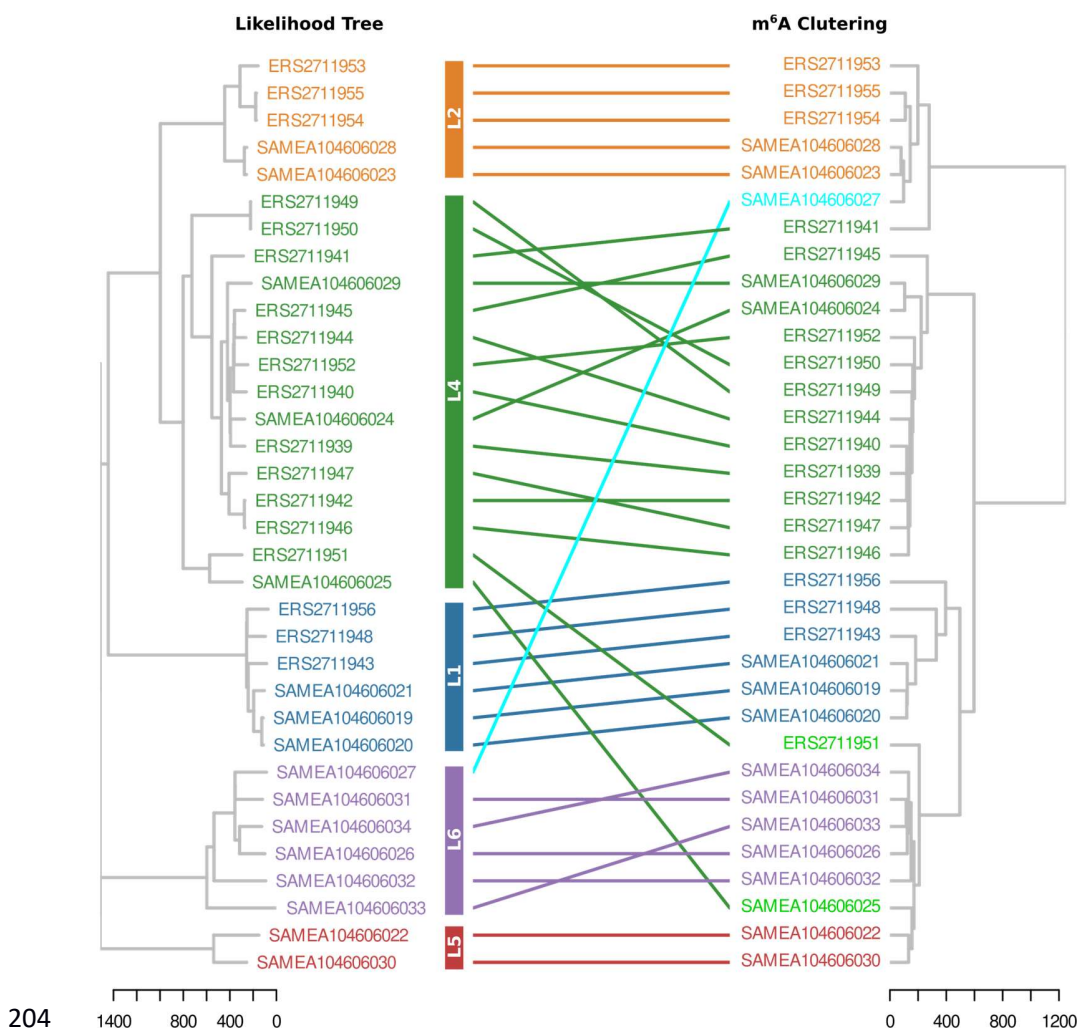

204  
205 **Figure 3. Tanglegram of hierarchically clustered samples.**

206 Clustering was based on IPD and ML phylogeny. Samples are coloured based on  
207 lineages. Three samples clustered separately from their lineage.

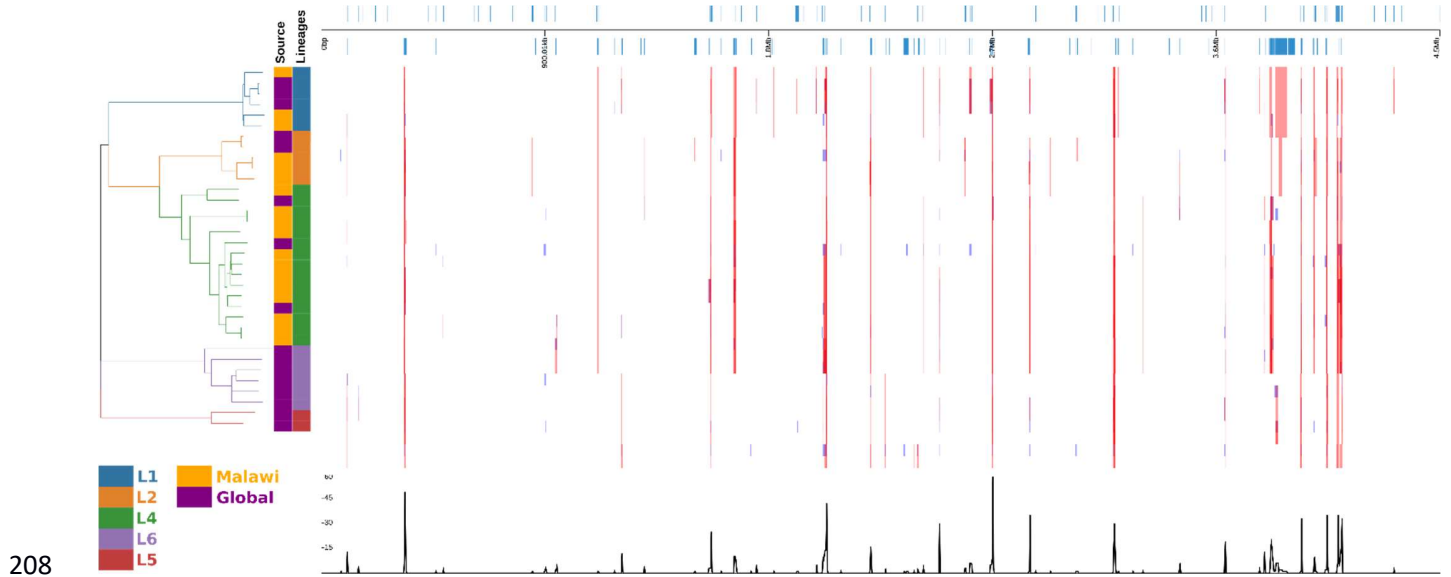

208

209 **Figure 4. Diverse region in different samples and lineages.**

210 Differences are displayed in alignment frame of the different samples and lineages  
211 calculated with default Gubbins parameters. Regions of affected gene locations in the  
212 alignment (top). The phylogeny of the 34 samples (left). Recombination events (bottom)

213

214 **Stability of methylation within *Mycobacterium tuberculosis* strains.**

215 It was important to study the effect of culture media on methylation patterns. Among our  
216 sequences isolates, two (ERS2711943 and ERS2711952) were MGIT grown, the  
217 methylation pattern did not appear distinct from the same lineages except “CACGCAG”  
218 for ERS2711943 was the lowest in the L1 samples, GATN<sub>4</sub>RTAC was detected in  
219 ERS2711943 only. No significant difference could be established between liquid and solid  
220 culture isolates for methylated motif CTGGAG (Fishers exact test p=0.76). As for motif  
221 CACGCAG solid cultured isolates were methylated at an average 76% while liquid  
222 cultures were methylated an average 97%. It was found that liquid cultured isolates were  
223 significantly more methylated than solid cultures (Fisher’s exact p=0.02) for motif

224 CACGCAG. It was observed that this difference was as a result of sample ERS2711943  
225 being lowly methylated at 56% compared to the rest at >95%.

226 We next investigated methylation within the gene regions and promoter regions of genes.  
227 Methylation within gene regions ranged between 49% to 51% in each strand and there  
228 was no over representation of methylation by strand (Chi squared test with Yates  
229 correction  $P=0.44$ ). On the other hand, methylation within promoter regions of genes  
230 ranged from 37% to 62% by strand of the promoter methylation. Again there was no  
231 significant statistical differences observed by strand (Fishers exact test  $P=0.19$ ).

232

## 233 **Discussion**

234 We sequenced 18 genomes of clinical *Mtb* isolates from Blantyre, Malawi using SMRT  
235 sequencing technology and analysed them along with a set of 16 global samples. Studies  
236 of *Mtb* DNA methylation using SMRT sequencing have focused on strains originating from  
237 the United States of America (Shell et al., 2013; Zhu et al., 2015), Asia (Zhu et al., 2015)  
238 and more recently a small global sample that included Europe, Asia, West Africa and  
239 South Africa (J. Phelan et al., 2018). To date no *Mtb* samples from Malawi or the  
240 surrounding region have been subjected to either PacBio SMRT sequencing technology  
241 or DNA methylation analysis. In our study, SMRT sequencing of 18 *Mtb* clinical isolates  
242 from Malawi revealed three confidently identified *Mtase* across the three lineages under  
243 study. The activity of these *Mtase* could be inactivated by three different mutations  
244 somewhat in a lineage specific manner. The *Mtase* *MamA* was found to be active in all  
245 isolates except three L2 (*Beijing*) isolates putatively courtesy of a point mutation A809C  
246 (E270A). This point mutation has been previously characterized (Shell et al., 2013).

247 Interestingly, L2 (*Beijing*) strains have a higher propensity to cause active disease and  
248 have been associated with increasing drug resistance in some geographical areas  
249 (Cowley et al., 2008; van der Spuy et al., 2009). Whether loss of this *Mtase* could be  
250 associated with success of this organism is an area of interest for future studies. A recent  
251 study however failed to establish a possible role of methylation in virulence of *Beijing*  
252 strains (*Computational characterisation of DNA methylomes in mycobacterium*  
253 *tuberculosis Beijing hyper- and hypo-virulent strains*, n.d.). Similarly, the *MamB* *Mtase*  
254 (motif CACGCAG) was absent in two (L1) Indo-oceanic isolates. This could be attributed  
255 to a C758T (S253L) novel missense mutation recently characterized elsewhere (J. Phelan  
256 et al., 2018) and confirmed in this study. While this mutation was putatively found to lead  
257 to partial methylation (50-60%) in a previous study, for the first time, we report that it could  
258 also lead to complete loss of *Mtase* activity as two of our L1 isolates had 0% methylation.  
259 And whether indeed this mutation is responsible for this partial/total loss of methylation  
260 now remains debatable. This mutation is present only in EAI6 family of L1 which have  
261 been shown to be responsible for recent TB outbreaks globally (Duarte et al., 2017). It is  
262 still unknown whether the C758T (S253L) mutation contributes to this transmission. Our  
263 investigations as to how the mutation C758T (S253L) could lead to partial loss of  
264 methylation in one sample and complete loss in others yielded nothing as we found the  
265 rest of the *mamB* gene to be identical in all the L1 samples including the global samples.  
266 There could be yet other unknown mechanisms, possibly a second gene regulating this  
267 methylation. In L4 isolates lack of *HsdM* methylation could be attributed to the C917T  
268 (P306L) mutation which was present in 11/12 Malawian isolates. Again lack of  
269 methylation was associated with this mutation in all L4 global samples. These results are

270 consistent with previous studies which seem to suggest that the P306L mutation is very  
271 common in L4 strains (Shell et al., 2013; Zhu et al., 2015). In one study, the mutation was  
272 found to be present in 35 out of 37 isolates L4 clinical isolates (Zhu et al., 2015). No  
273 cognate restriction enzyme for *HsdM* has been identified suggesting it could be an orphan  
274 *Mtase* (Zhu et al., 2015). Its principal function could therefore be related to gene regulation  
275 rather than restriction modification. Lineage 4 isolates have the highest global prevalence  
276 than any other lineage and more studies will be required to establish whether loss of  
277 *HsdM* methylation could be associated with this global success. If indeed *HsdM Mtase* is  
278 disrupted by this mutation in L4, it remains intriguing how some L1 isolates could lose  
279 *HsdM Mtase* in absence of P306L mutation or any other mutation in the *hsdM* gene. The  
280 high frequency of *Mtase* disrupting mutations in *Mtb* could be suggestive of a competitive  
281 fitness advantage such as immune evasion or even persistence. We found the efficiency  
282 of *Mtases* to be highly variable within and across lineages even in presence of a *Mtase*  
283 gene. The polyketide synthase (*pks15/1*) locus is responsible for biosynthesis of phenolic  
284 glycolipid (PGL), a cell wall component (Caws et al., 2008; Reed et al., 2004) and has  
285 widely been used to discriminate between L4 isolates against L1 and L2 isolates owing  
286 to a 7bp deletion in L4 isolates (Caws et al., 2008; Gagneux & Small, 2007) . In this study  
287 for the first time, we have demonstrated the potential of using the *pks15/1* locus to classify  
288 L5 isolates using 9bp (CGGTGCTGG) deletion a distinct substitution A50G and an  
289 insertion GGGCCGC while L6 isolates could also be classified using a 6bp (GGGCCGC)  
290 at the same position of the 7bp deletion in L4 isolates. The *pks15/1* locus therefore could  
291 be a valuable marker for identifying isolates belonging to L5 and L6. The large number of  
292 genomic re-arrangements observed in mostly cell wall component genes PPE, PE-PGRS

293 and ESAT-6 is evidence of the large variations that exist among different strains and  
294 lineages of *Mtb* in responding to host immunity.

295 We believe the complete characterization of DNA methylation in *Mtb* could help provide  
296 clues to some of the clinical phenotypes which have been associated with strain and  
297 lineage variation. In this study no compelling correlation could be established between  
298 methylation and *Mtb* growth condition although MGIT cultures were shown to sequence  
299 at a slightly lower coverage. Overall data presented in this study shows the potential of  
300 SMRT sequencing long reads to help us better understand the complete biology of  
301 *Mycobacterium tuberculosis* by resolving difficult regions of the genome and elucidating  
302 the complete methylome of the pathogen. This study could not establish the direct  
303 association between mutations and loss of *Mtase* activity and also why some samples  
304 could show low levels of *Mtase* activity than others. To better understand the complete  
305 impact of DNA methylation within specific strains and lineages, subsequent studies will  
306 need to integrate transcriptomic and proteomic data to methylomes.

307

## 308 **Materials and methods**

### 309 **Sample collection**

310 Frozen archived clinical isolates from a previous prospective cohort study, Studying  
311 Persistence and Understanding Tuberculosis in Malawi (S.P.U.T.U.M) (Sloan et al., 2015)  
312 were characterized. These were from patients aged 16-65 years old presenting with  
313 bacteriologically culture confirmed pulmonary *Mtb* between June 2010 and December  
314 2011 at Queen Elizabeth Central Hospital in Blantyre, Malawi. Out of a total of 133 *Mtb*



315 positive isolates, 18 were selected based on which isolates were the first to be  
316 successfully revived from frozen state and used in this study.

317

### 318 **Bacterial growth conditions**

319 All experiments involving *Mtb* were performed in a Biosafety Level (BSL) 3 Laboratory,  
320 University of Malawi-College of Medicine/ Malawi Liverpool Welcome Trust (CoM/MLW)  
321 TB laboratory and at Liverpool School of Tropical Medicine following Standard Operating  
322 Procedures (SOPs). All reagents used were from Sigma-Aldrich unless otherwise stated.  
323 For liquid culture, strains were grown in Middlebrook 7H9 broth base supplemented with  
324 oleic acid, albumin, dextrose and catalase (OADC) and an antibiotic mixture of polymyxin  
325 B, amphotericin B, nalidixic acid, trimethoprim and azlocillin (PANTA). Tubes were  
326 incubated in a BACTEC MGIT 960 instrument at 37°C and monitored once a week for  
327 possible growth for up to eight weeks. Isolates used in the study were from a previous  
328 study for which ethics approval had previously been granted by the College of Medicine  
329 Ethics Committee (COMREC), University of Malawi (Sloan et al., 2015). Solid culture  
330 inoculation was done on Lowenstein-Jensen (LJ) slopes following laboratory SOP.  
331 Cultures were grown to mid-log phase and harvested at ~7th week and used for DNA  
332 isolation. *Mtb* was confirmed using both the BD MGIT TBC ID test device (Becton  
333 Dickinson, Maryland U.S.A) following manufacturer's instructions and Ziehl Neelsen (ZN)  
334 staining for acid fast bacilli (AFB).

335

### 336 **DNA Extraction**

337 Genomic DNA was isolated using the traditional Cetyltrimethylammonium bromide  
338 (CTAB) method as previously described (Somerville et al., 2005). Extracted DNA was  
339 quantified using Qubit 3.0 fluorometer (Life Technologies, USA) according to  
340 manufacturer's instructions and DNA purity was determined on a NanoDrop ND-1000  
341 Spectrophotometer V3.7 (Thermo Scientific, Wilmington U.S.A) following manufacturer's  
342 instructions. DNA purity was checked at absorbance 260nm and 280nm by calculating a  
343 ratio of A260/A280. DNA quality was analyzed on 1.5% Agarose Gel electrophoresis and  
344 visualized under UV light following ethidium bromide staining.

### 345 **Genotyping of *Mtb* Isolates**

346 Genotyping of isolates was done at the Liverpool School of Tropical Medicine, United  
347 Kingdom. Lineage specific deletions were detected using a singleplex PCR based method  
348 with specific oligonucleotide primers targeting the regions of difference RD239, RD105  
349 and RD750. PCR reactions were performed as documented in our previous publication  
350 (Ndhlovu et al., 2019).

### 351 **DNA Sequencing**

352 Purified genomic DNA libraries were sequenced at the Centre for Genomic Research  
353 (CGR), Institute of Integrative Biology, University of Liverpool, United Kingdom. DNA  
354 libraries were purified with 1x cleaned AMPure beads (Agencourt) and the quantity and  
355 quality was assessed using the Qubit and NanoDrop assays respectively. In addition, the  
356 Fragment Analyzer using a high sensitivity genomic kit (Advanced Analytical  
357 Technologies, Inc.) was used to determine the average size of the DNA and the extent of  
358 degradation. DNA was treated with Exonuclease V11 at 37 °C for 15 minutes. The ends

359 of the DNA were repaired as described by the manufacturer (Pacific Biosciences, Menlo  
360 Park, CA, USA). The sample was incubated for 20 minutes at 37 °C with DNA damage  
361 repair mix supplied in the SMRTbell library kit (Pac Bio). This was followed by a 5-minute  
362 incubation at 25 °C with end repair mix. DNA was cleaned using 0.5x AMPure and 70%  
363 ethanol washes. DNA was ligated to adapter overnight at 25 °C. Ligation was terminated  
364 by incubation at 65°C for 10 minutes followed by exonuclease treatment for 1 hour at  
365 37°C. The SMRTbell library was purified with 0.5x AMPure beads. The library was size  
366 selected with 0.75% blue pippin cassettes in the range 7000-20000 bp. The recovered  
367 fragments were damage repaired again. The quantity of library and therefore the recovery  
368 was determined by Qubit assay and the average fragment size determined by Fragment  
369 Analyzer. SMRTbell library was annealed to sequencing primer at values predetermined  
370 by the Binding Calculator (PacBio) and a complex made with the DNA polymerase (P6/C4  
371 chemistry). The complex was bound to Magbeads and this was used to set up the  
372 required number of SMRT cells for the project (two for each sample). Sequencing was  
373 performed on Pacific Biosciences RSII sequencing system (Pacific Biosciences, Menlo  
374 Park, CA, USA) using 360-minute movie times per cell, yielding ~ 300x average genome  
375 coverage. The generated data have been submitted to the ENA databases (Bio-Project:  
376 [PRJEB28592](https://www.ncbi.nlm.nih.gov/bioproject/PRJEB28592)).

### 377 **Bioinformatics Analysis**

378 Generated long Pacbio reads were analysed using the  
379 RS\_Modification\_and\_Motif\_Analysis.1 protocol as part of SMRT analysis in SMRT  
380 Portal (version 2.2.0). To increase the robustness of our analysis, we included previously  
381 published *Mtb* methylation study Pacbio data (Bio-project: PRJEB21888) (J. Phelan et

382 al., 2018) and conducted both genomic and methylation comparisons of the two datasets.  
383 Although Bio-project PRJEB21888 had 18 genomes, we could only access 16 and these  
384 were used in our analysis. However, we evaluated PRJEB21888 sequences using SMRT  
385 Portal (version 5.1.0). Reads were mapped using the Basic Local Alignment with  
386 Successive Refinement (BLASR) (Chaisson & Tesler, 2012) algorithm within the SMRT  
387 portal. Strain specific genomes were generated by mapping the reads to the reference  
388 genome (H37Rv) using Quiver tool. Standard settings were used to detect base  
389 modifications and methylation motifs in the strain's genome. Inter-pulse duration (IPD)  
390 ratio (observed vs expected) was measured for the modification detection (Zhu et al.,  
391 2015). Computational validation of our samples' lineages and lineage identification of  
392 PRJEB21888 samples were done using TB-Profiler (Jody E Phelan et al., n.d.).  
393 Comparative analysis of *pks15* (*Rv2947c*) gene was used to report lineages of the  
394 samples specifically those from PRJEB21888. The MAFFT (version 7.310) (Kato &  
395 Standley, 2013) was used to generate multiple sequence alignment of consensus  
396 sequences against H37Rv reference. Following removal of the reference from the  
397 alignment, maximum likelihood (ML) phylogeny was constructed for the remaining  
398 sequences using RaxML (v8.2.12) GTR+ $\Gamma$  model (Stamatakis, 2014) applying 1000  
399 bootstrap iterations. Although *Mtb* has a highly rigid and non-recombinogenic genome  
400 (>99% nucleotide identity), to report diverse genomic regions among isolates, Gubbins  
401 (2.4.1) (Croucher et al., 2015) was applied with the default parameters over previously  
402 generated alignment of 34 genomes and earlier constructed ML phylogeny as an initial  
403 tree. Identified recombination hot spots were plotted with phylogeny generated without

404 hot spots, affected genes details and the metadata using Phandango (Hadfield et al.,  
405 2018). Samples were clustered hierarchically based on m6A IPD ratio pattern.

406 Multiple sequence alignment of *Mtase* genes (*mamA*, *mamB*, *hsdM* and *hsdS*) sequences  
407 against the reference gene from H37Rv genome was used to identify possible mutations  
408 responsible for loss of methylation. Comparative analysis of well characterized  
409 methylation sites among samples were performed. Clustering of the samples based on  
410 their reported IPD ratios at methylated sites was performed and compared with clustering  
411 in ML phylogeny.

412

## 413 **Acknowledgements**

414 We thank the guardians and patients who participated in this study, and the staff at Queen  
415 Elizabeth Central Hospital for their assistance.

## 416 **Competing Interests**

417 The authors declare no interest

418

419

420

421

422

423

424

## 425 **References**

- 426 Albanna, A. S., Reed, M. B., Kotar, K. V, Fallow, A., McIntosh, F. A., Behr, M. A., &  
427 Menzies, D. (2011). Reduced transmissibility of East African Indian strains of  
428 *Mycobacterium tuberculosis*. *PloS One*, 6(9), e25075.  
429 <https://doi.org/10.1371/journal.pone.0025075> [doi]
- 430 Balaban, N. Q., Merrin, J., Chait, R., Kowalik, L., & Leibler, S. (2004). Bacterial  
431 Persistence as a Phenotypic Switch. *Science*, 305(5690), 1622–1625.  
432 <https://doi.org/10.1126/science.1099390>
- 433 Brennan, M. J., & Delogu, G. (2002). The PE multigene family: a ‘molecular mantra’ for  
434 mycobacteria. *Trends in Microbiology*, 10(5), 246–249.  
435 [https://doi.org/http://dx.doi.org/10.1016/S0966-842X\(02\)02335-1](https://doi.org/http://dx.doi.org/10.1016/S0966-842X(02)02335-1)
- 436 Casadesus, J., & Low, D. (2006). Epigenetic gene regulation in the bacterial world.  
437 *Microbiology and Molecular Biology Reviews : MMBR*, 70(3), 830–856.  
438 <https://doi.org/70/3/830> [pii]
- 439 Caws, M., Thwaites, G., Dunstan, S., Hawn, T. R., Lan, N. T., Thuong, N. T.,  
440 Stepniewska, K., Huyen, M. N., Bang, N. D., Loc, T. H., Gagneux, S., van  
441 Soolingen, D., Kremer, K., van der Sande, M., Small, P., Anh, P. T., Chinh, N. T.,  
442 Quy, H. T., Duyen, N. T., ... Farrar, J. (2008). The influence of host and bacterial  
443 genotype on the development of disseminated disease with *Mycobacterium*  
444 *tuberculosis*. *PLoS Pathogens*, 4(3), e1000034.  
445 <https://doi.org/10.1371/journal.ppat.1000034> [doi]
- 446 Chaisson, M. J., & Tesler, G. (2012). Mapping single molecule sequencing reads using  
447 basic local alignment with successive refinement (BLASR): application and theory.  
448 *BMC Bioinformatics*, 13, 238. <https://doi.org/10.1186/1471-2105-13-238> [doi]

- 449 Cole, S. T. (1999). Learning from the genome sequence of *Mycobacterium tuberculosis*  
450 H37Rv. *FEBS Letters*, 452(1–2), 7–10.  
451 [https://doi.org/http://dx.doi.org/10.1016/S0014-5793\(99\)00536-0](https://doi.org/http://dx.doi.org/10.1016/S0014-5793(99)00536-0)
- 452 Cole, S. T. (2002). Comparative and functional genomics of the *Mycobacterium*  
453 tuberculosis complex. *Microbiology*, 148(10), 2919–2928.
- 454 *Computational characterisation of DNA methylomes in mycobacterium tuberculosis*  
455 *Beijing hyper- and hypo-virulent strains*. (n.d.). Retrieved April 10, 2020, from  
456 <https://etd.uwc.ac.za/xmlui/handle/11394/4756>
- 457 Constant, P., Perez, E., Malaga, W., Laneelle, M., Saurel, O., Daffe, M., & Daffe, M.  
458 (2002). Role of pks15/1 gene in the Biosynthesis of Phenoglycolipids in the  
459 *Mycobacterium tuberculosis* complex. EVIDENCE THAT ALL STRAINS  
460 SYNTHESIZE GLYCOSYLATED p-HYDROXYBENZOIC METHYL ESTERS AND  
461 THAT STRAINS DEVOID OF PHENOLGLYCOLIPIDS HABOUR A FRAMESHIFT  
462 MUTAT. *Journal of Biological Chemistry*, 227, 38148–38158.
- 463 Cowley, D., Govender, D., February, B., Wolfe, M., Steyn, L., Evans, J., Wilkinson, R.  
464 J., & Nicol, M. P. (2008). Recent and rapid emergence of W-Beijing strains of  
465 *Mycobacterium tuberculosis* in Cape Town, South Africa. *Clinical Infectious*  
466 *Diseases: An Official Publication of the Infectious Diseases Society of America*,  
467 47(10), 1252–1259. <https://doi.org/10.1086/592575> [doi]
- 468 Croucher, N. J., Page, A. J., Connor, T. R., Delaney, A. J., Keane, J. A., Bentley, S. D.,  
469 Parkhill, J., & Harris, S. R. (2015). Rapid phylogenetic analysis of large samples of  
470 recombinant bacterial whole genome sequences using Gubbins. *Nucleic Acids*  
471 *Research*. <https://doi.org/10.1093/nar/gku1196>

- 472 Davies, P., Barnes, P., & Gordon, S. (Eds.). (2014). *Clinical Tuberculosis* (5th ed.). CRC  
473 Press.
- 474 De Schacht, C., Mutaquiha, C., Faria, F., Castro, G., Manaca, N., Manhiça, I., & Cowan,  
475 J. (2019). Barriers to access and adherence to tuberculosis services, as perceived  
476 by patients: A qualitative study in Mozambique. *PLoS ONE*, *14*(7).  
477 <https://doi.org/10.1371/journal.pone.0219470>
- 478 Duarte, T. A., Nery, J. S., Boechat, N., Pereira, S. M., Simonsen, V., Oliveira, M.,  
479 Gomes, M. G. M., Penha-Goncalves, C., Barreto, M. L., & Barbosa, T. (2017). A  
480 systematic review of East African-Indian family of Mycobacterium tuberculosis in  
481 Brazil. *The Brazilian Journal of Infectious Diseases : An Official Publication of the*  
482 *Brazilian Society of Infectious Diseases*, *21*(3), 317–324. [https://doi.org/S1413-](https://doi.org/S1413-8670(16)30547-5)  
483 [8670\(16\)30547-5](https://doi.org/S1413-8670(16)30547-5) [pii]
- 484 Filliol, I., Motiwala, A. S., Cavatore, M., Qi, W., Hazbón, M. H., del Valle, M. B., Fyfe, J.,  
485 García-García, L., Rastogi, N., Sola, C., Zozio, T., Guerrero, M. I., León, C. I.,  
486 Crabtree, J., Angiuoli, S., Eisenach, K. D., Durmaz, R., Joloba, M. L., Rendón, A.,  
487 ... Alland, D. (2006). Global Phylogeny of Mycobacterium tuberculosis Based on  
488 Single Nucleotide Polymorphism (SNP) Analysis: Insights into Tuberculosis  
489 Evolution, Phylogenetic Accuracy of Other DNA Fingerprinting Systems, and  
490 Recommendations for a Minimal Standard SNP Set. *Journal of Bacteriology*,  
491 *188*(2), 759–772. <https://doi.org/10.1128/JB.188.2.759-772.2006>
- 492 Fishbein, S., van Wyk, N., Warren, R. M., & Sampson, S. L. (2015). Phylogeny to  
493 function: PE/PPE protein evolution and impact on Mycobacterium tuberculosis  
494 pathogenicity. *Molecular Microbiology*, *96*(5), 901–916.



- 495 <https://doi.org/10.1111/mmi.12981> [doi]
- 496 Gagneux, S., & Small, P. M. (2007). Global phylogeography of *Mycobacterium*  
497 tuberculosis and implications for tuberculosis product development. *The*  
498 *Lancet.Infectious Diseases*, 7(5), 328–337. [https://doi.org/S1473-3099\(07\)70108-1](https://doi.org/S1473-3099(07)70108-1)  
499 [pii]
- 500 Grover, S., Sharma, T., Singh, Y., Kohli, S., Manjunath, P., Singh, A., Wieler, L. H.,  
501 Tedin, K., Ehtesham, N. Z., Hasnain, S. E., & Semmler, T. (2018). The PGRS  
502 domain of *Mycobacterium tuberculosis* PE\_PGRS protein Rv0297 is involved in  
503 Endoplasmic reticulum stress-mediated apoptosis through toll-like receptor 4. *MBio*,  
504 9(3). <https://doi.org/10.1128/mBio.01017-18>
- 505 Hadfield, J., Croucher, N. J., Goater, R. J., Abudahab, K., Aanensen, D. M., & Harris, S.  
506 R. (2018). Phandango: An interactive viewer for bacterial population genomics.  
507 *Bioinformatics*. <https://doi.org/10.1093/bioinformatics/btx610>
- 508 Hershberg, R., Lipatov, M., Small, P. M., Sheffer, H., Niemann, S., Homolka, S., Roach,  
509 J. C., Kremer, K., Petrov, D. A., Feldman, M. W., & Gagneux, S. (2008). High  
510 functional diversity in *Mycobacterium tuberculosis* driven by genetic drift and  
511 human demography. *PLoS Biology*, 6(12), e311.  
512 <https://doi.org/10.1371/journal.pbio.0060311> [doi]
- 513 Katoh, K., & Standley, D. M. (2013). MAFFT multiple sequence alignment software  
514 version 7: improvements in performance and usability. *Molecular Biology and*  
515 *Evolution*, 30(4), 772–780. <https://doi.org/10.1093/molbev/mst010> [doi]
- 516 Ndhlovu, V., Kiran, A., Sloan, D., Mandala, W., Kontogianni, K., Kamdolozi, M., Caws,  
517 M., & Davies, G. (2019). Genetic diversity of *Mycobacterium tuberculosis* clinical

518 isolates in Blantyre, Malawi. *Heliyon*, 5(10).  
519 <https://doi.org/10.1016/j.heliyon.2019.e02638>

520 Phelan, J., de Sessions, P. F., Tientcheu, L., Perdigao, J., Machado, D., Hasan, R.,  
521 Hasan, Z., Bergval, I. L., Anthony, R., McNerney, R., Antonio, M., Portugal, I.,  
522 Viveiros, M., Campino, S., Hibberd, M. L., & Clark, T. G. (2018). Methylation in  
523 *Mycobacterium tuberculosis* is lineage specific with associated mutations present  
524 globally. *Scientific Reports*, 8(1), 160-017-18188-y. [https://doi.org/10.1038/s41598-](https://doi.org/10.1038/s41598-017-18188-y)  
525 017-18188-y [doi]

526 Phelan, J E, Coll, F., Bergval, I., Anthony, R. M., Warren, R., Sampson, S. L., van  
527 Pittius, N. C. G., Glynn, J. R., Crampin, A. C., Alves, A., Bessa, T. B., Campino, S.,  
528 Dheda, K., Grandjean, L., Hasan, R., Hasan, Z., Miranda, A., Moore, D., Panaiotov,  
529 S., ... Clark, T. G. (2016). Recombination in *pe/ppe* genes contributes to genetic  
530 variation in *Mycobacterium tuberculosis* lineages. *BMC Genomics*, 17, 151-016-  
531 2467-y. <https://doi.org/10.1186/s12864-016-2467-y> [doi]

532 Phelan, Jody E, O'sullivan, D. M., Machado, D., Ramos, J., Oppong, Y. E. A., Campino,  
533 S., O'grady, J., Mcnerney, R., Hibberd, M. L., Viveiros, M., Huggett, J. F., & Clark,  
534 T. G. (n.d.). *Integrating informatics tools and portable sequencing technology for*  
535 *rapid detection of resistance to anti-tuberculous drugs*.  
536 <https://doi.org/10.1186/s13073-019-0650-x>

537 Reed, M. B., Domenech, P., Manca, C., Su, H., Barczak, A. K., Kreiswirth, B. N.,  
538 Kaplan, G., & 3rd, C. E. B. (2004). A glycolipid of hypervirulent tuberculosis strains  
539 that inhibits the innate immune response. *Nature*, 431(7004), 84–87.  
540 <https://doi.org/10.1038/nature02837> [doi]

- 541 Shell, S. S., Prestwich, E. G., Baek, S. H., Shah, R. R., Sasseti, C. M., Dedon, P. C., &  
542 Fortune, S. M. (2013). DNA methylation impacts gene expression and ensures  
543 hypoxic survival of *Mycobacterium tuberculosis*. *PLoS Pathogens*, *9*(7), e1003419.  
544 <https://doi.org/10.1371/journal.ppat.1003419> [doi]
- 545 Sloan, D. J., Mwandumba, H. C., Garton, N. J., Khoo, S. H., Butterworth, A. E., Allain,  
546 T. J., Heyderman, R. S., Corbett, E. L., Barer, M. R., & Davies, G. R. (2015).  
547 Pharmacodynamic Modeling of Bacillary Elimination Rates and Detection of  
548 Bacterial Lipid Bodies in Sputum to Predict and Understand Outcomes in  
549 Treatment of Pulmonary Tuberculosis. *Clinical Infectious Diseases : An Official  
550 Publication of the Infectious Diseases Society of America*, *61*(1), 1–8.  
551 <https://doi.org/10.1093/cid/civ195> [doi]
- 552 Somerville, W., Thibert, L., Schwartzman, K., & Behr, M. A. (2005). Extraction of  
553 *Mycobacterium tuberculosis* DNA: a Question of Containment. *Journal of Clinical  
554 Microbiology*, *43*(6), 2996–2997. <https://doi.org/10.1128/JCM.43.6.2996-2997.2005>
- 555 Stamatakis, A. (2014). RAxML version 8: a tool for phylogenetic analysis and post-  
556 analysis of large phylogenies. *Bioinformatics (Oxford, England)*, *30*(9), 1312–1313.  
557 <https://doi.org/10.1093/bioinformatics/btu033> [doi]
- 558 van der Spuy, G. D., Kremer, K., Ndabambi, S. L., Beyers, N., Dunbar, R., Marais, B. J.,  
559 van Helden, P. D., & Warren, R. M. (2009). Changing *Mycobacterium tuberculosis*  
560 population highlights clade-specific pathogenic characteristics. *Tuberculosis  
561 (Edinburgh, Scotland)*, *89*(2), 120–125. <https://doi.org/10.1016/j.tube.2008.09.003>  
562 [doi]
- 563 WHO. (2020). WHO | Global tuberculosis report 2019. WHO.

564 Zhu, L., Zhong, J., Jia, X., Liu, G., Kang, Y., Dong, M., Zhang, X., Li, Q., Yue, L., Li, C.,  
565 Fu, J., Xiao, J., Yan, J., Zhang, B., Lei, M., Chen, S., Lv, L., Zhu, B., Huang, H., &  
566 Chen, F. (2015). Precision methylome characterization of *Mycobacterium*  
567 tuberculosis complex (MTBC) using PacBio single-molecule real-time (SMRT)  
568 technology. *Nucleic Acids Research*, 44(2), 730–743.  
569 <https://doi.org/10.1093/nar/gkv1498>

## 570 **Supplementary files**

571 Supplementary Table 1. Methylation efficiency for 34 *Mycobacterium tuberculosis*  
572 samples

573

574
